# Supplementary material for: Efficacy and Safety of Armolipid Plus®: An Updated PRISMA Compliant Systematic Review and Meta-Analysis of Randomized Controlled Clinical Trials
Source: MDPI journal article supplement (doi:10.3390/nu13020638), 2021-02-16

## SUPPLEMENTARY MATERIALS

**Figure S1.** Forest plot displaying mean differences and 95% confidence intervals for the impact of supplementation with Armolipid Plus® on weight and WC.

### Weight

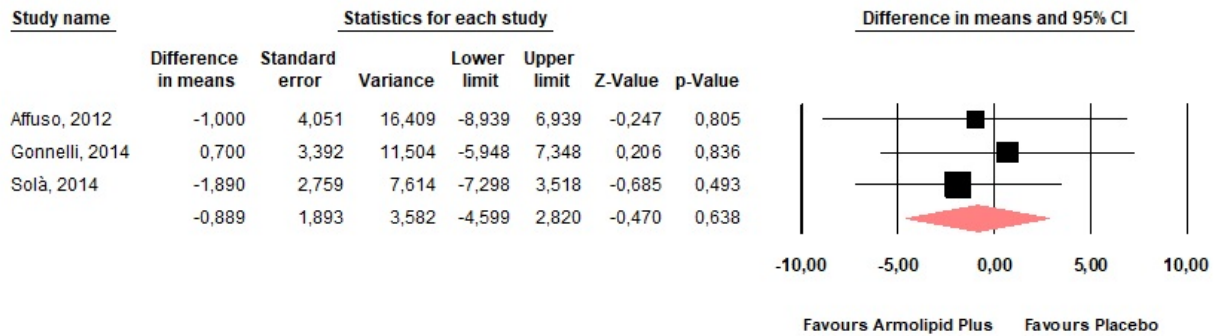

### Waist Circumference

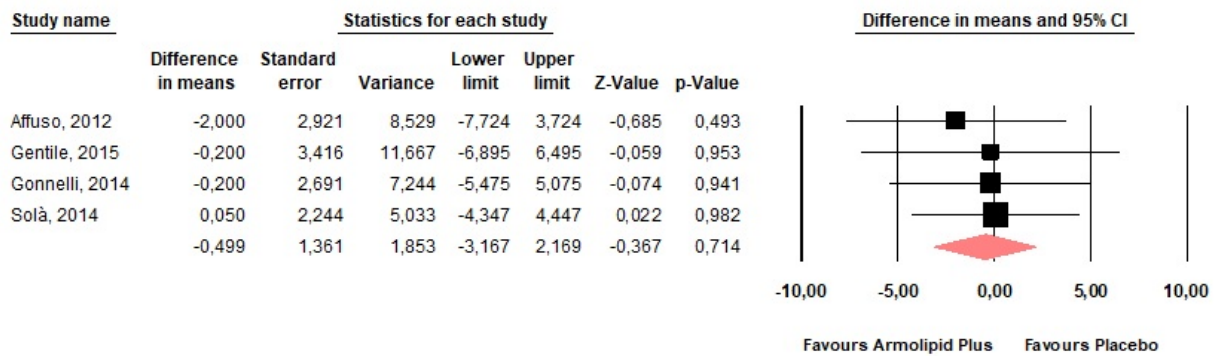

**Figure S2.** Forest plot displaying mean differences and 95% confidence intervals for the impact of supplementation with Armolipid Plus® on SBP and DBP.

## Systolic Blood Pressure

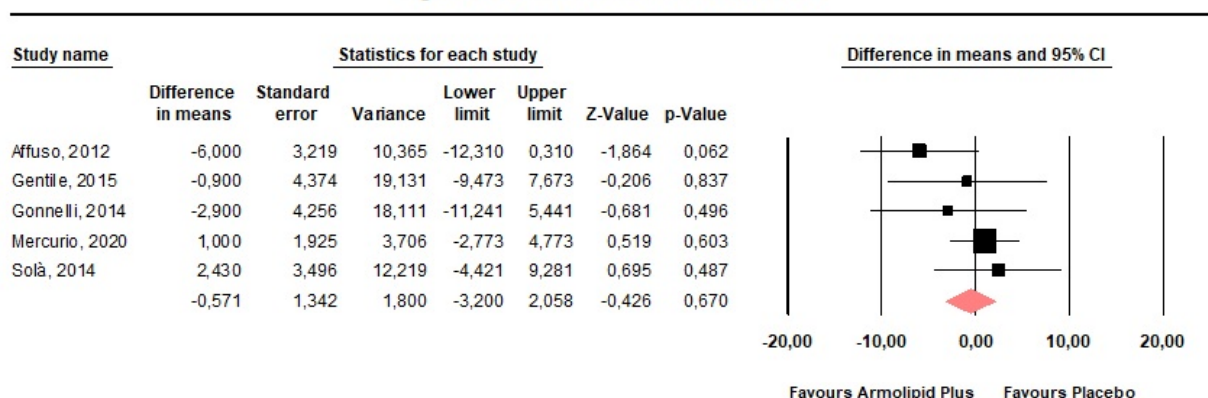

## Diastolic Blood Pressure

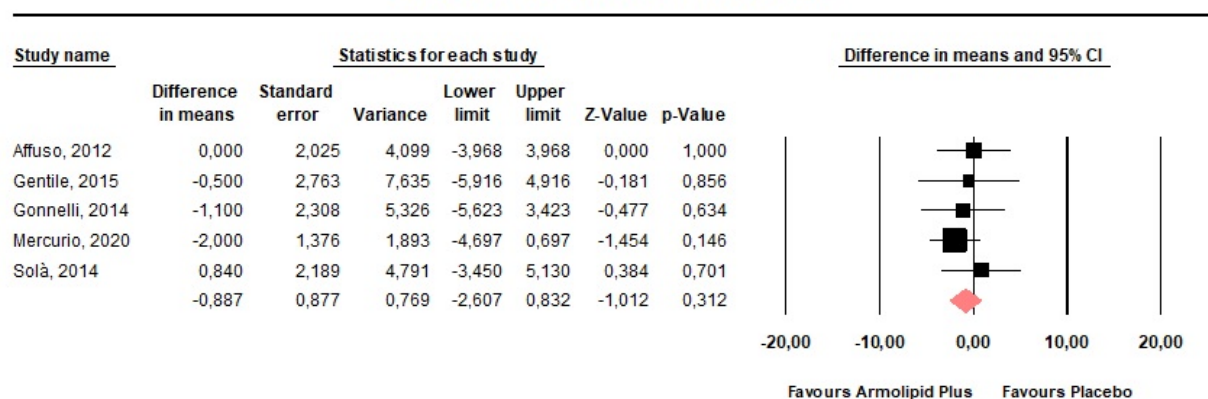

**Figure S3.** Forest plot displaying mean differences and 95% confidence intervals for the impact of supplementation with Armolipid Plus® on FPI and HOMA-IR.

## Fasting Plasma Insulin

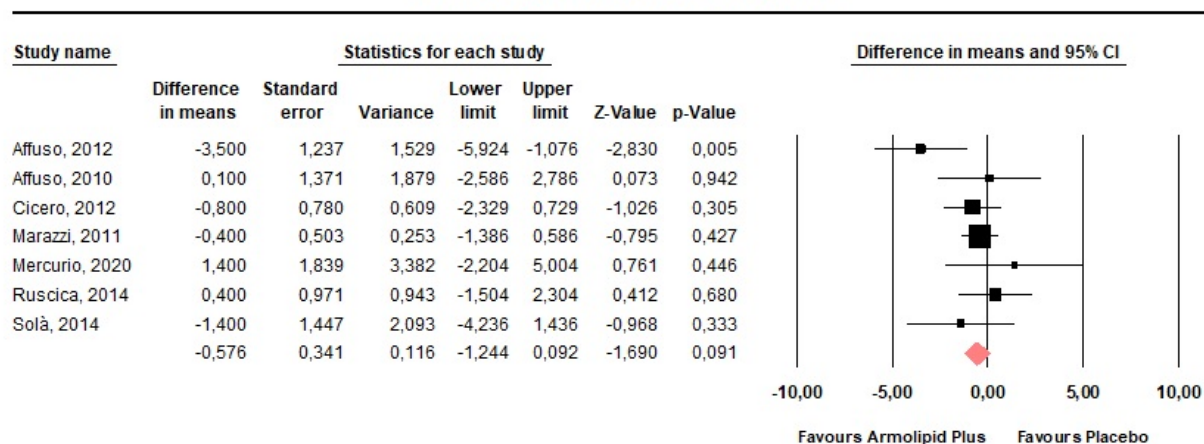

## HOMA-IR

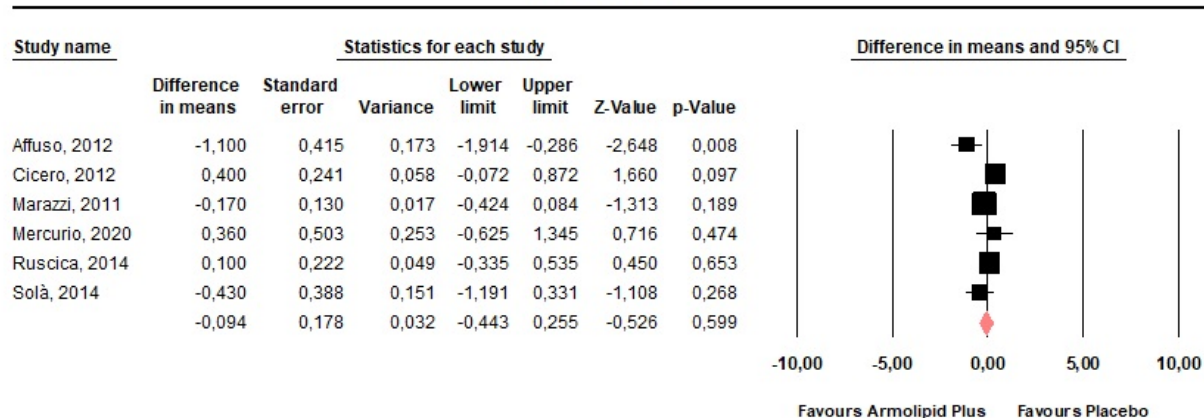

**Figure S4.** Funnel plots detailing publication bias for the effect of supplementation with Armolipid Plus® on weight, BMI and waist circumference.

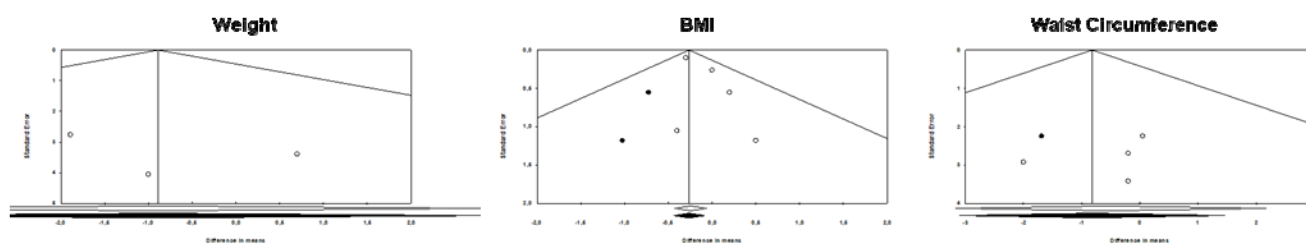

**Figure S5.** Funnel plots detailing publication bias for the effect of supplementation with Armolipid Plus® on blood pressure.

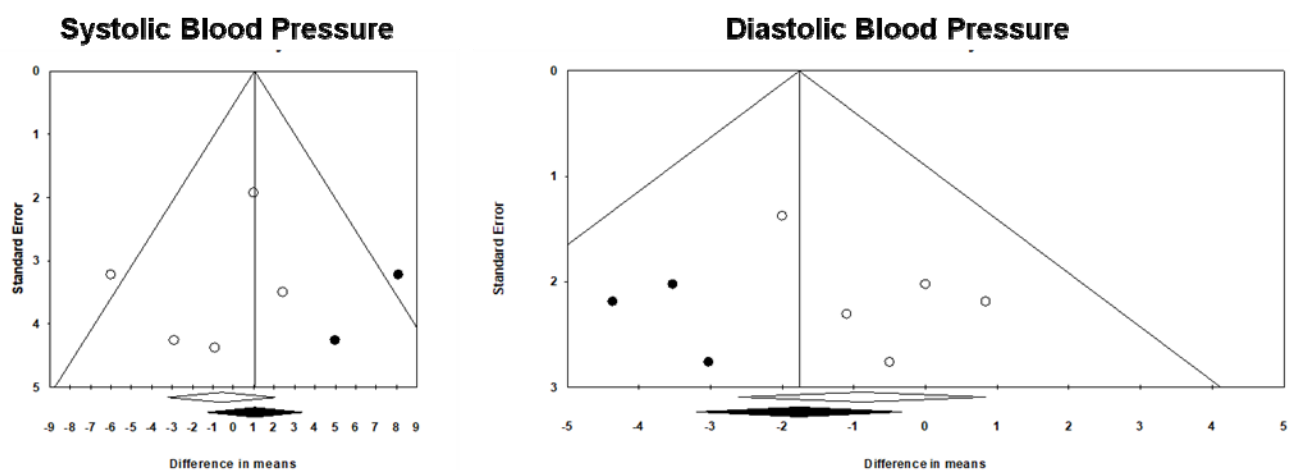

**Figure S6.** Funnel plots detailing publication bias for the effect of supplementation with Armolipid Plus® on serum lipids concentrations.

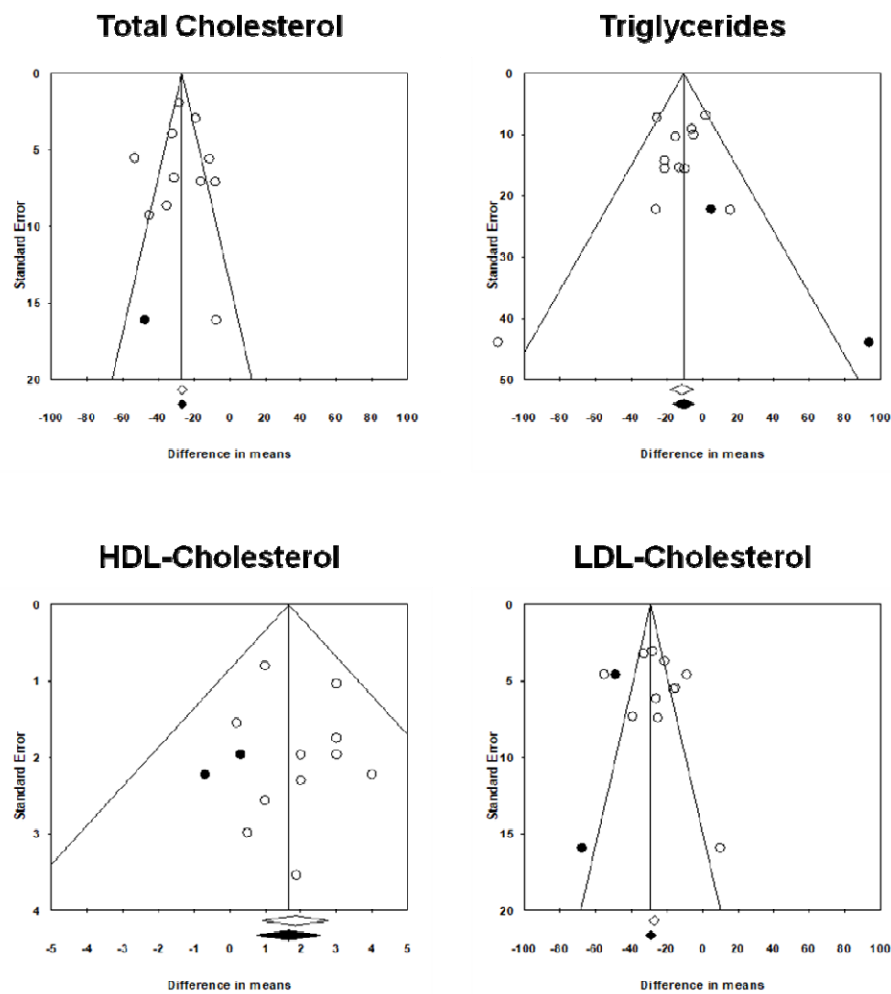

**Figure S7.** Funnel plots detailing publication bias for the effect of supplementation with Armolipid Plus® on glycemia and markers of insulin resistance.

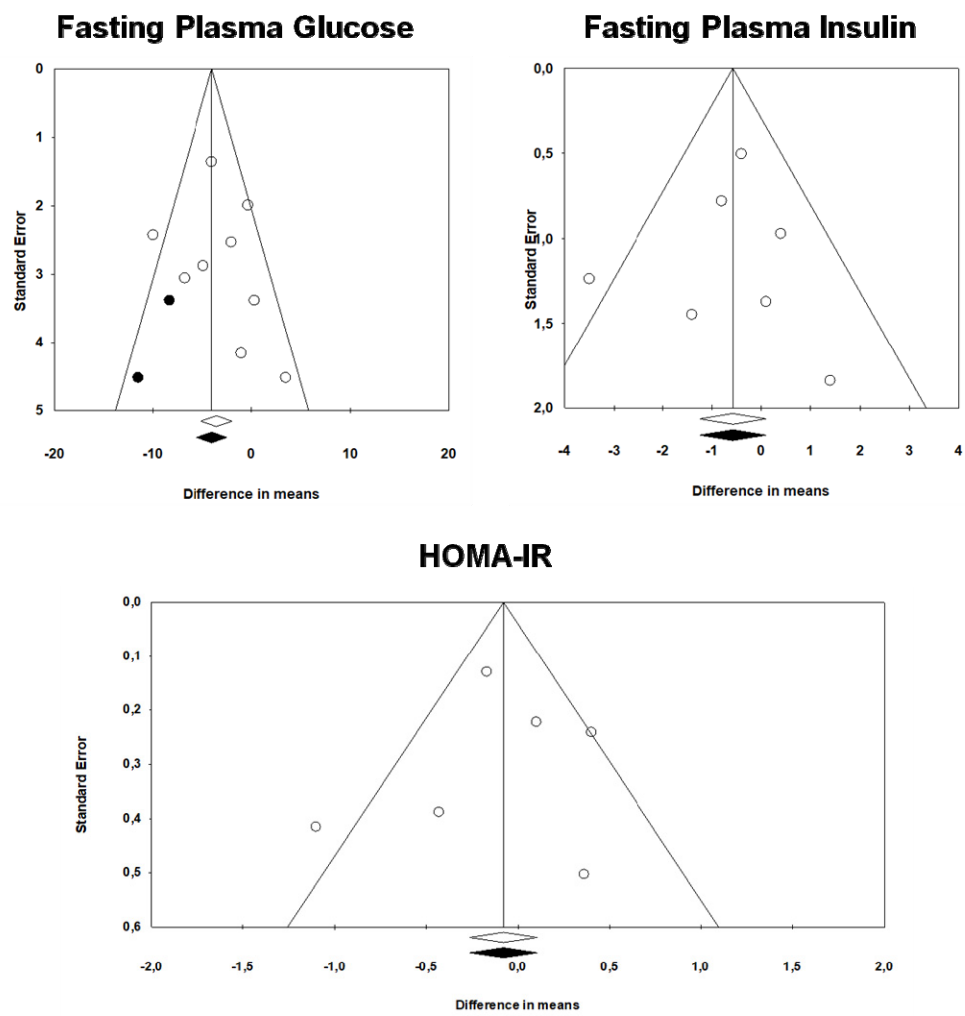

**Figure S8.** Forest plot displaying mean differences and 95% confidence intervals for the impact of supplementation with Armolipid Plus® on AST and CPK.

## Aspartate Aminotransferase

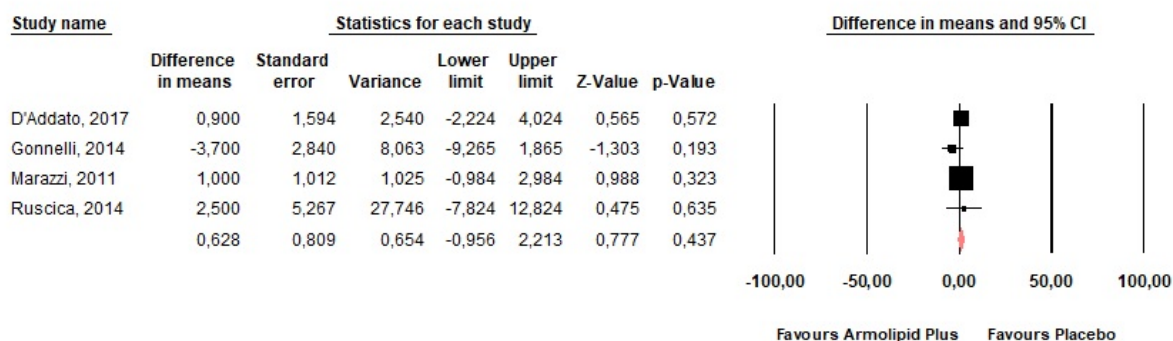

## Creatine Phosphokinase

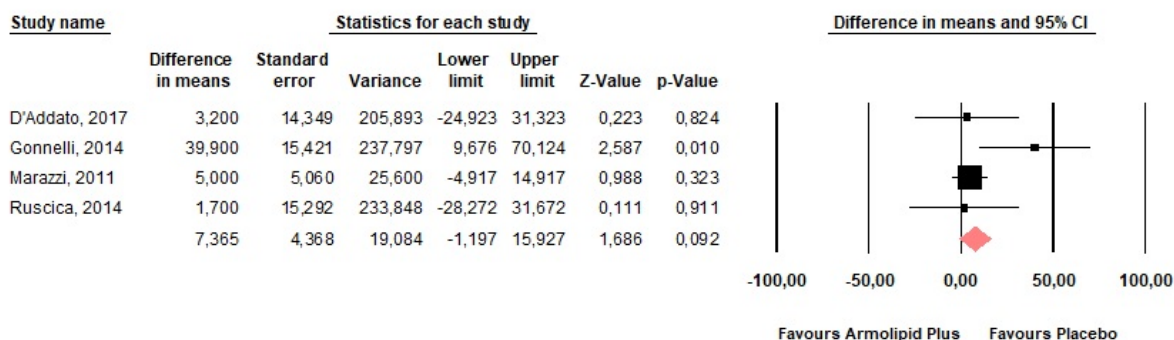

**Figure S9.** Forest plots displaying the risk of treatment-emergent adverse events during supplementation with Armolipid Plus®.

## Musculoskeletal Disorders

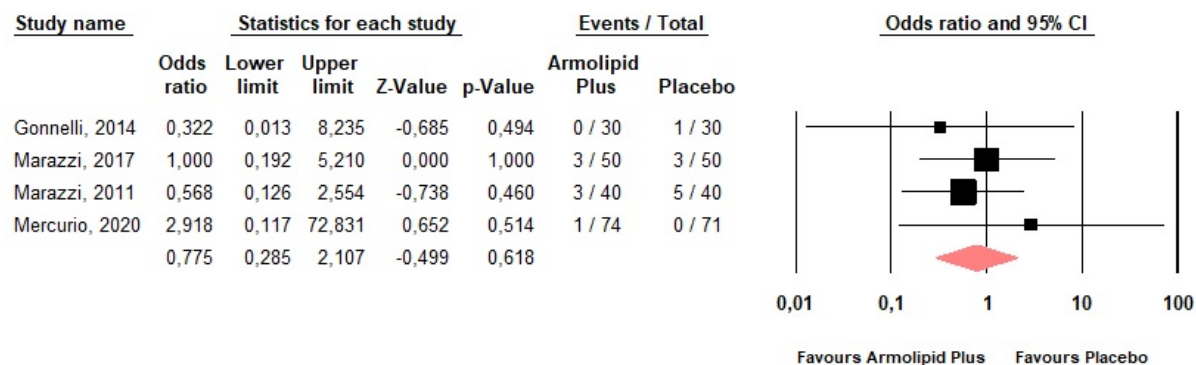

## Gastrointestinal Disorders

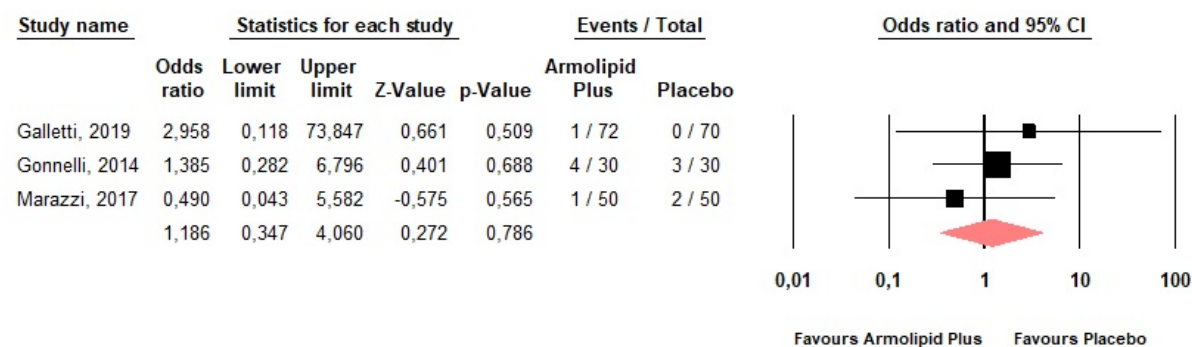



**Figure S10.** Funnel plot detailing publication bias for the effect of supplementation with Armolipid Plus® on serum concentrations of ALT.

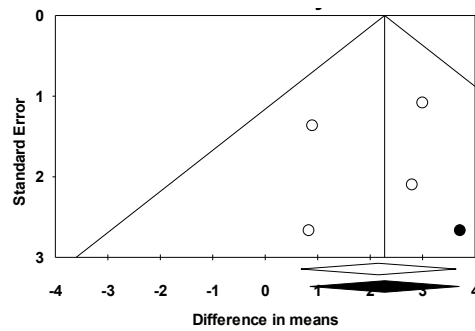

**Figure S11.** Funnel plot detailing publication bias for the effect of supplementation with Armolipid Plus® on serum concentrations of AST.

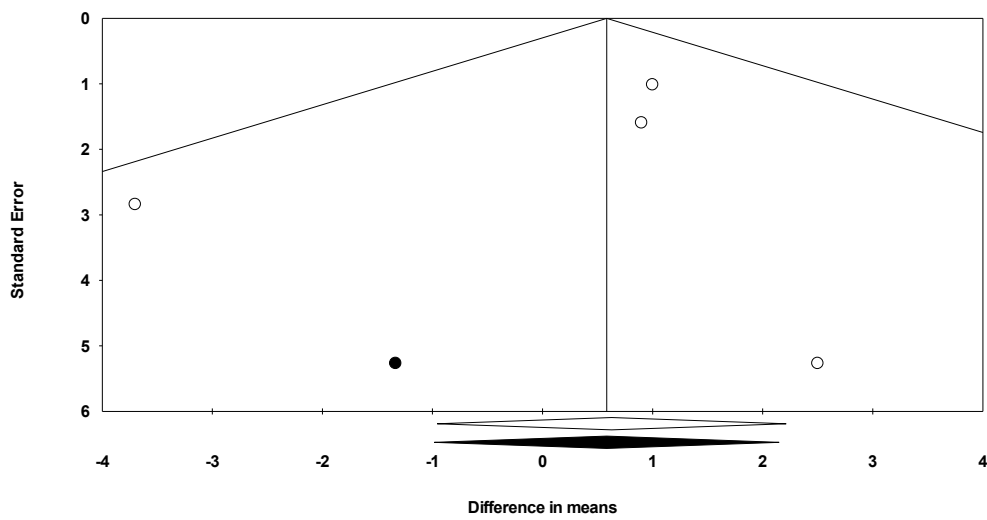

**Figure S12.** Funnel plot detailing publication bias for the effect of supplementation with Armolipid Plus® on serum concentrations of CPK.

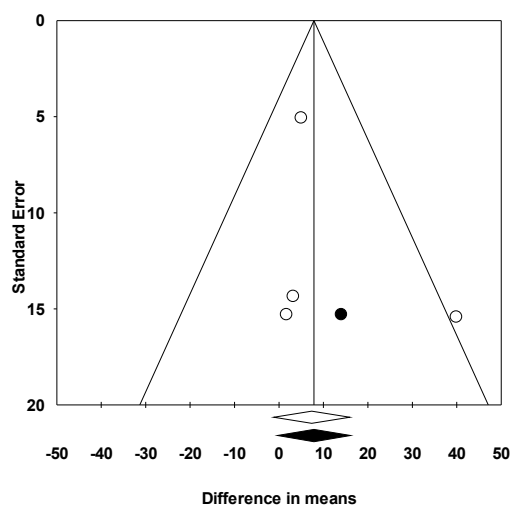

**Figure S13.** Funnel plot detailing publication bias for risk of treatment-emergent adverse events during supplementation with Armolipid Plus®.

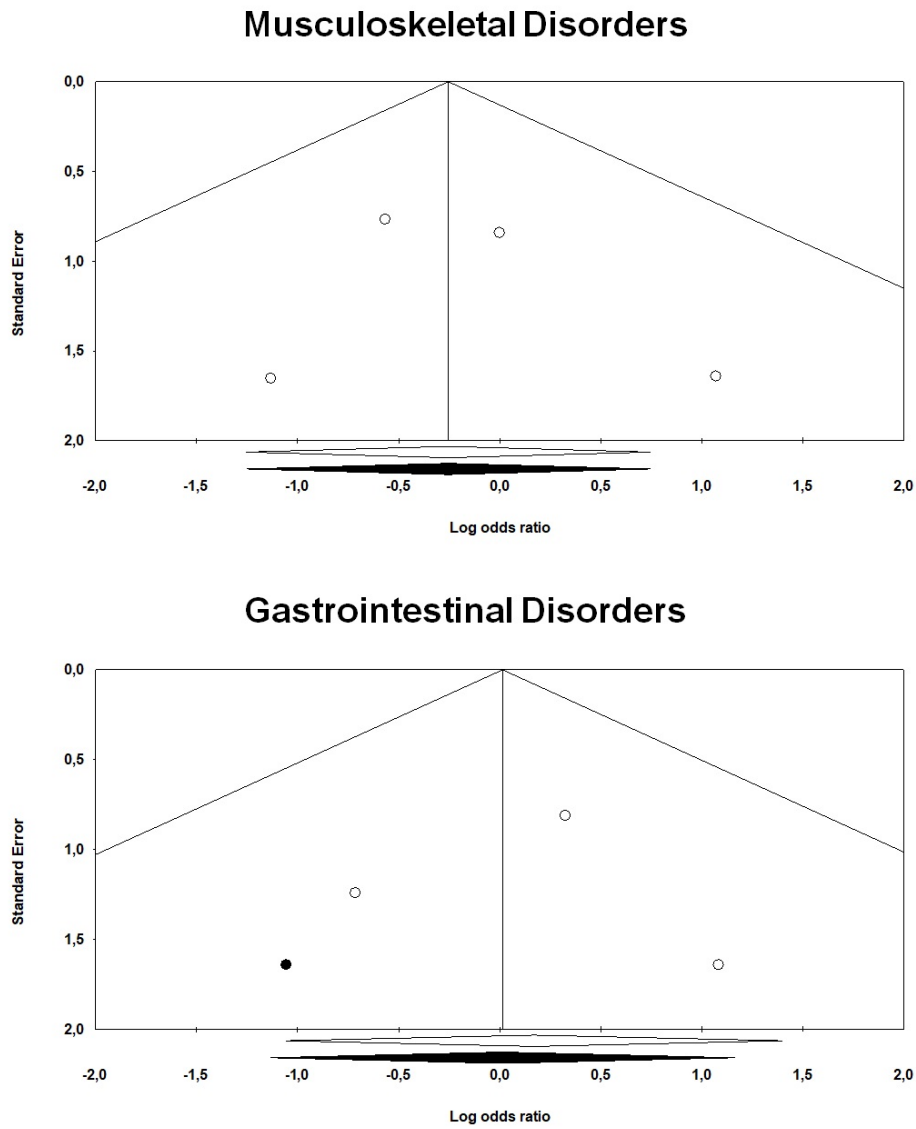

Supplement: s1 [file s1]
